# Supplementary material
Source: HighWire-hosted journal article supplement (https://endocrinology-journals.org/content/suppl/2017/05/02/JOE-17-0018)
Supplement: supplementary_figure_2.pdf [file supplementary_figure_2.pdf]

## ESM Figure 2

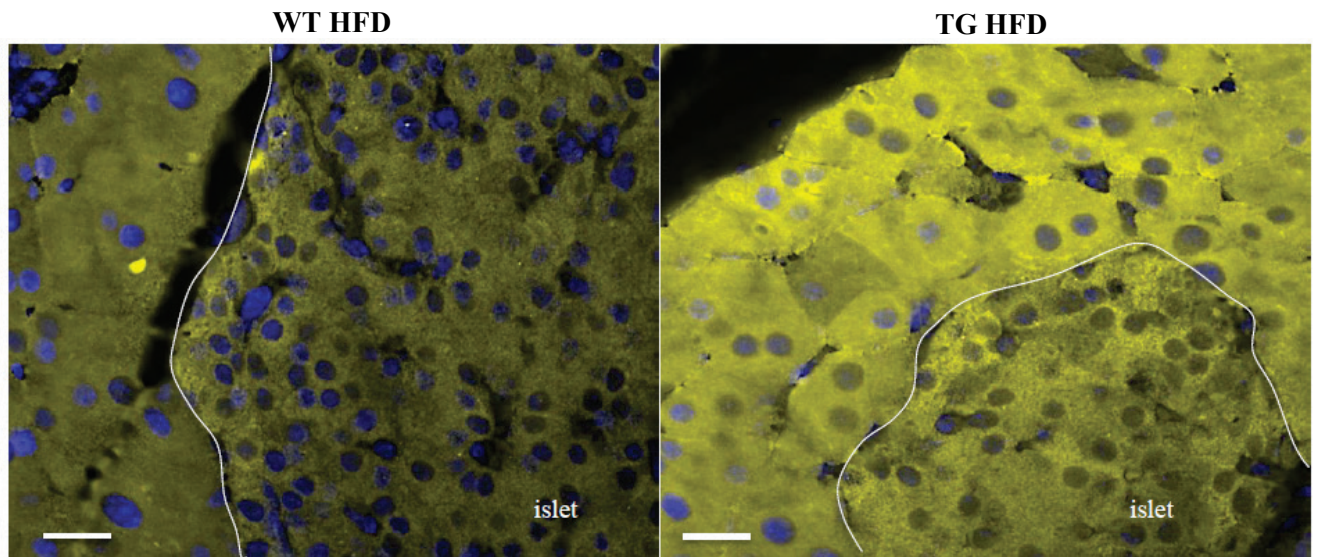

**ESM Figure 2.** Analysis of STK25 protein abundance in the pancreas of high-fat-fed *Stk25* transgenic and wild-type mice. Representative immunofluorescence images stained with antibody for STK25; nuclei stained with DAPI (blue). Dashed lines denote islet boundaries. Scale bars, 15  $\mu$ m. HFD, high-fat diet; TG, transgenic; WT, wild-type.
