# Supplementary material
Source: HighWire-hosted journal article supplement (https://endocrinology-journals.org/content/suppl/2017/05/02/JOE-17-0018)
Supplement: supplementary_figure_7.pdf [file supplementary_figure_7.pdf]

## ESM Figure 7

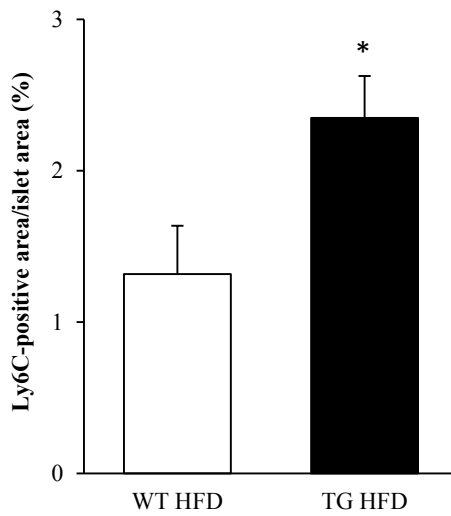

**ESM Figure 7.** Quantification of Ly6C staining in pancreatic islets of high-fat-fed *Stk25* transgenic and wild-type mice. Data are mean  $\pm$  SEM from 6 mice per genotype. \* $p < 0.05$ . HFD, high-fat diet; TG, transgenic; WT, wild-type.
