# Supplementary material
Source: HighWire-hosted journal article supplement (https://endocrinology-journals.org/content/suppl/2017/05/02/JOE-17-0018)
Supplement: supplementary_figure_10.pdf [file supplementary_figure_10.pdf]

## ESM Figure 10

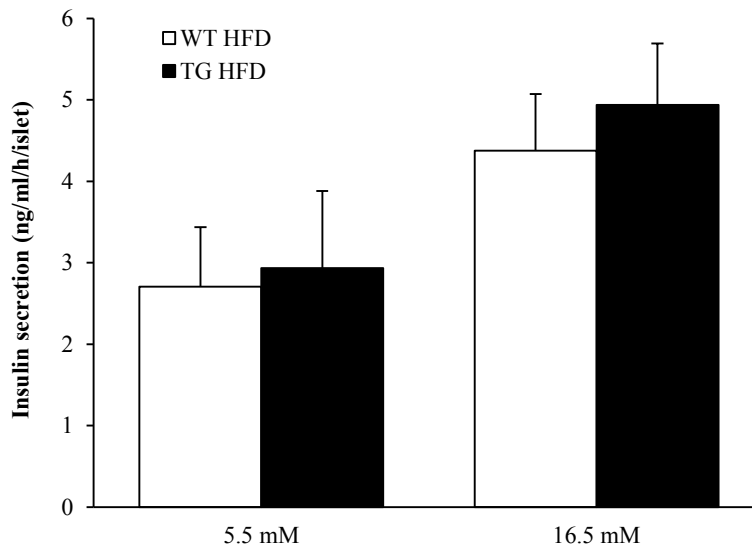

**ESM Figure 10.** *In vitro* glucose-stimulated insulin secretion from pancreatic islets isolated from high-fat-fed *Stk25* transgenic and wild-type mice. Data are mean  $\pm$  SEM from 4-5 mice per genotype. HFD, high-fat diet; TG, transgenic; WT, wild-type.
